# Supplementary material
Source: HighWire-hosted journal article supplement (http://www.qdcxjkg.com/highwire/filestream/129989/field_highwire_adjunct_files/0/ERJ-02087-2015_Supplement.pdf)
Supplement: ERJ-02087-2015_Supplement.pdf [file ERJ-02087-2015_Supplement.pdf]

## **Supplemental material**

### **Unfavourable effects of medically indicated oral anticoagulants on survival in IPF**

Michael Kreuter, Marlies S Wijsenbeek, Martina Vasakova, Paolo Spagnolo, Martin Kolb,  
Ulrich Costabel, Derek Weycker, Klaus-Uwe Kirchgaessler, Toby M Maher

SUPPLEMENTARY TABLE S1. Summary of anticoagulant use and indication

| Parameter              | AC baseline users<br>(N=32) | AC ever-users<br>(N=54) |
|------------------------|-----------------------------|-------------------------|
| Indication, n (%)      |                             |                         |
| Atrial fibrillation    | 11 (34.4)                   | 18 (33.3)               |
| Prophylaxis            | 8 (25.0)                    | 12 (22.2)               |
| Deep vein thrombosis   | 6 (18.8)                    | 11 (20.4)               |
| Other <sup>a</sup>     | 4 (12.5)                    | 8 (14.8)                |
| Pulmonary embolism     | 2 (6.3)                     | 3 (5.6)                 |
| Cardiovascular disease | 1 (3.1)                     | 2 (3.7)                 |
| Anticoagulant, n (%)   |                             |                         |
| Warfarin               | 29 (90.6)                   | 44 (81.5)               |
| Dabigatran             | 2 (6.3)                     | 4 (7.4)                 |
| Fondaparinux           | 0                           | 4 (7.4)                 |
| Acenocoumarol          | 1 (3.1)                     | 1 (1.9)                 |
| Bivalirudin            | 0                           | 1 (1.9)                 |

<sup>a</sup>Carotid artery disease, cerebrovascular accident, hepatocancer, mitral valve replacement, pulmonary arterial hypertension, aortic valve replacement, worsening osteoarthritis, acute blood clot

AC: anticoagulant

SUPPLEMENTARY TABLE S2. Summary of baseline demographics: anticoagulant ever-users versus non-users

| <b>Parameter</b>                      | <b>AC ever-users<br/>(N=54)</b> | <b>AC non-users<br/>(N=570)</b> | <b>p-value</b> |
|---------------------------------------|---------------------------------|---------------------------------|----------------|
| Mean age, years (SD)                  | 70.7 (6.4)                      | 66.8 (7.5)                      | 0.0002         |
| Sex, n (%)                            |                                 |                                 |                |
| Male                                  | 40 (74.1)                       | 425 (74.6)                      | 0.9374         |
| Mean % predicted FVC (SD)             | 69.3 (13.0)                     | 72.2 (13.7)                     | 0.1349         |
| Mean % predicted DLco (SD)            | 42.6 (8.2)                      | 45.9 (11.3)                     | 0.0091         |
| Mean 6MWD, m (SD)                     | 374.2 (109.7)                   | 415.4 (91.9)                    | 0.0023         |
| Mean UCSD SOBQ score (SD)             | 39.0 (23.0)                     | 34.5 (21.4)                     | 0.1436         |
| Medical history, n (%)                |                                 |                                 |                |
| Cardiovascular disease                | 22 (40.7)                       | 145 (25.4)                      | 0.0152         |
| Chronic renal failure                 | 5 (9.3)                         | 15 (2.6)                        | 0.0082         |
| Chronic obstructive pulmonary disease | 2 (3.7)                         | 20 (3.5)                        | 0.9408         |
| Pulmonary embolism                    | 5 (9.3)                         | 1 (0.2)                         | <0.0001        |
| Pulmonary hypertension                | 4 (7.4)                         | 15 (2.6)                        | 0.0509         |
| Atrial fibrillation                   | 19 (35.2)                       | 10 (1.8)                        | <0.0001        |
| Deep vein thrombosis                  | 11 (20.4)                       | 6 (1.1)                         | <0.0001        |
| Cardiovascular risk factors           |                                 |                                 |                |
| Hypertension                          | 33 (61.1)                       | 307 (53.9)                      | 0.3064         |
| Smoker (current/former)               | 35 (64.8)                       | 349 (61.2)                      | 0.6046         |
| Diabetes                              | 11 (20.4)                       | 123 (21.6)                      | 0.8362         |
| Hypercholesterolemia                  | 29 (53.7)                       | 266 (46.7)                      | 0.3222         |
| Obesity (BMI >30 kg/m <sup>2</sup> )  | 25 (46.3)                       | 240 (42.1)                      | 0.5515         |

6MWD: 6-minute walk distance; AC: anticoagulant; BMI: body mass index; DLco: carbon monoxide diffusing capacity; FVC: forced vital capacity; SD: standard deviation; UCSD SOBQ, The University of California in San Diego Shortness of Breath Questionnaire

SUPPLEMENTARY TABLE S3. Unadjusted 1-year risk of study outcomes for anticoagulant ever-users and non-users

| <b>Outcome</b>                                            | <b>AC ever-users<br/>(N=54)</b> | <b>AC non-users<br/>(N=570)</b> | <b>p-value</b> |
|-----------------------------------------------------------|---------------------------------|---------------------------------|----------------|
| Disease progression composite outcome, <sup>a</sup> n (%) | 29 (57.4)                       | 216 (37.9)                      | 0.0230         |
| All-cause mortality                                       | 9 (16.7)                        | 23 (4.0)                        | <0.0001        |
| FVC decrease $\geq$ 10%                                   | 8 (14.8)                        | 56 (9.8)                        | 0.2480         |
| 6MWD decrease $\geq$ 150 m                                | 12 (22.2)                       | 137 (24.0)                      | 0.7652         |
| Mortality, n (%)                                          |                                 |                                 |                |
| All-cause mortality                                       | 11 (20.4)                       | 31 (5.4)                        | <0.0001        |
| IPF-related mortality                                     | 10 (18.5)                       | 18 (3.2)                        | <0.0001        |
| FVC change, n (%)                                         |                                 |                                 |                |
| Absolute decrease $\geq$ 10%                              | 9 (27.8)                        | 102 (17.2)                      | 0.0536         |
| Relative decrease $\geq$ 10%                              | 12 (38.9)                       | 170 (28.8)                      | 0.1198         |
| Mean FVC change observed, % predicted (SD)                | -6.9 (7.5)                      | -5.1 (6.8)                      | 0.0997         |
| 6MWD decrease $\geq$ 50 m, n (%)                          | 9 (27.8)                        | 157 (26.5)                      | 0.8380         |
| All-cause hospitalisation, n (%)                          | 12 (38.9)                       | 102 (17.2)                      | 0.0001         |

<sup>a</sup>Only the first disease progression event was counted for each patient

6MWD: 6-minute walk distance; AC: anticoagulant; FVC: forced vital capacity; IPF: idiopathic pulmonary fibrosis; SD: standard deviation

SUPPLEMENTARY TABLE S4. Multivariate analyses: anticoagulant ever-users versus non-users

| <b>Parameter</b>                             | <b>HR</b> | <b>95% CI</b> | <b>p-value</b> |
|----------------------------------------------|-----------|---------------|----------------|
| Disease progression <sup>a</sup>             | 2.5       | 1.4, 4.3      | 0.001          |
| Mortality                                    |           |               |                |
| All-cause mortality                          | 4.8       | 1.9, 11.7     | <0.001         |
| IPF-related mortality                        | 8.1       | 2.9–22.9      | <0.001         |
| FVC                                          |           |               |                |
| Absolute decrease $\geq 5\%$                 | 2.3       | 1.3, 3.9      | 0.002          |
| Relative decrease $\geq 5\%$                 | 1.7       | 1.0, 2.7      | 0.034          |
| Absolute decrease $\geq 10\%$                | 4.2       | 2.1, 8.4      | <0.001         |
| Relative decrease $\geq 10\%$                | 2.5       | 1.3, 4.8      | 0.005          |
| Death or FVC (absolute) $\geq 10\%$ decrease | 3.5       | 2.0, 6.1      | <0.001         |
| Death or 6MWD decrease $\geq 50$ m           | 2.5       | 1.5, 4.4      | <0.001         |
| All-cause hospitalisation                    | 3.7       | 2.1, 6.7      | <0.001         |

<sup>a</sup>Defined as  $\geq 10\%$  decrease in % predicted FVC,  $\geq 50$  m decline in 6MWD or death

6MWD: 6-minute walk distance; CI: confidence interval; FVC: forced vital capacity; HR: hazard ratio; IPF: idiopathic pulmonary fibrosis
